# Supplementary material
Source: PubMed Central journal article supplement (PMC4862888)
Supplement: NIHMS741284-supplement.pdf [file NIHMS741284-supplement.pdf]

## Supplementary Material

### *Characterization of non-specific binding by carbamazepine*

Frontal analysis experiments were conducted with carbamazepine on the control column to characterize the non-specific binding of carbamazepine with the support. Figure S1 shows a double-reciprocal plot that was prepared according to Eqn. (1) to analyze data that were obtained for carbamazepine at 37°C and pH 7.4. A good linear fit was observed when using Eqn. (1) and a single-site model, resulting in a correlation coefficient of 0.9999 ( $n = 6$ ). The association equilibrium constant and binding capacity for carbamazepine on the control column were determined from the slope and intercept of this plot; this approach gave values of  $1.8 (\pm 0.3) \times 10^3 \text{ M}^{-1}$  and  $1.4 (\pm 0.2) \times 10^{-6} \text{ mol}$ , respectively. These values were then used with Eqn. (2) to correct for non-specific binding by carbamazepine within the entrapped AGP column, as is described in the main body of the text.

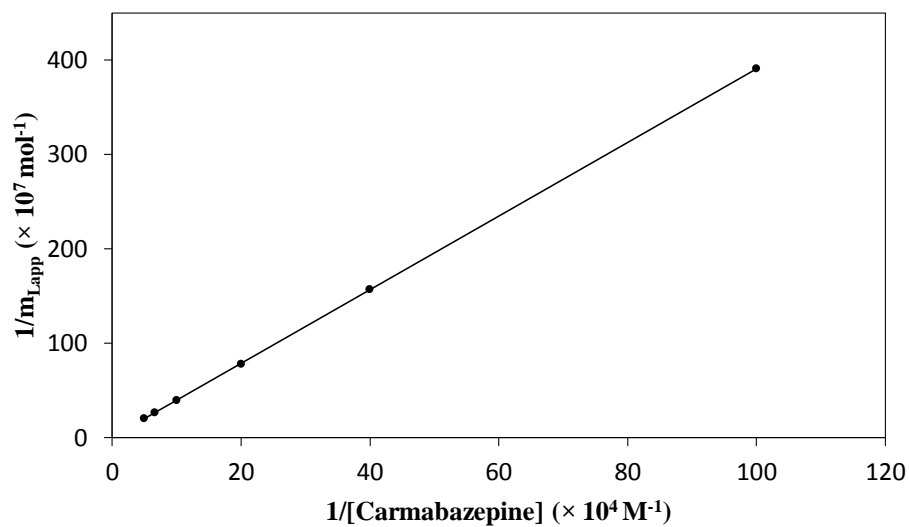

**Figure S1.** Double-reciprocal plot prepared according to Eqn. (1) for the binding of carbamazepine to a control column at 37 °C and pH 7.4. The support used in the control column was silica with a pore size of 100 Å.
